# Supplementary material
Source: publisher site journal article supplement (http://www.degruyter.com/publication/journal_key/DEMO/downloadAsset/DEMO_Special%20Issue%20in%20Memory%20of%20Abe%20Sklar.pdf)
Supplement: Supplementary file 1 [file DEMO_Special%20Issue%20in%20Memory%20of%20Abe%20Sklar.pdf]

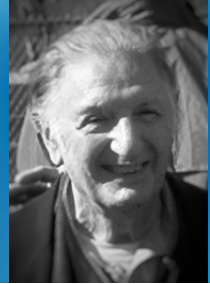

## SPECIAL ISSUE ON COPULAS IN MEMORY OF ABE SKLAR (1925-2020)

### GUEST EDITORS

---

Roger Nelsen and Carlo Sempi

### DESCRIPTION

---

Abraham (Abe) Sklar, one of the milestone personalities in the field of copulas and dependence modeling, passed away on October 30, 2020 at the age of 94.

To commemorate Abe, Dependence Modeling will publish a special issue devoted to his memory with the plan to have it published in the second half of 2021.

Both original research contributions and survey papers on copula theory are welcome, especially those emphasizing methodological and applied aspects of Sklar's research ideas.

### HOW TO SUBMIT

---

All submissions to the special issue must be made electronically at <http://www.editorialmanager.com/depmod/> and will undergo the standard peer review process. When submitting your paper please choose "**SI in memory of Abe Sklar**".

**The deadline for the submissions is May 31, 2021** but individual papers will be reviewed and published online on an ongoing basis.

Contributors to this Special Issue will benefit from:

- ▶ No article publication fees
- ▶ No Copyright constraints
- ▶ Unlimited and free Open Access for all readers
- ▶ Fair and constructive peer review provided by experts in the field
- ▶ Fast online publication of articles

We are looking forward to your submission. If you have any question, please contact us at [demo.editorial@degruyter.com](mailto:demo.editorial@degruyter.com)
